# Supplementary material for: Mixed Model Methods for Genomic Prediction and Variance Component Estimation of Additive and Dominance Effects Using SNP Markers
Source: PLOS journal article supplement (doi:10.1371/journal.pone.0087666), 2014-01-30
Supplement: S1 (10.1371/journal.pone.0087666.s001) [file journal.pone.0087666.s001]

**Table S1 GREML estimates of variance components and heritabilities of additive and dominance effects (mean  $\pm$  standard deviation,  $n=10$  repeats)**

| $h^2$ and $\sigma^2$   | SNP type and density | $\hat{h}_\alpha^2$ | $\hat{h}_\delta^2$ | $\hat{\sigma}_\alpha^2$ | $\hat{\sigma}_\delta^2$ |
|------------------------|----------------------|--------------------|--------------------|-------------------------|-------------------------|
| $h_\alpha^2=0.05$      | 1K_QTL               | 0.06 $\pm$ 0.01    | 0.03 $\pm$ 0.02    | 0.06 $\pm$ 0.02         | 0.04 $\pm$ 0.02         |
| $h_\delta^2=0.05$      | 1K_SNP               | 0.04 $\pm$ 0.01    | 0.01 $\pm$ 0.02    | 0.04 $\pm$ 0.02         | 0.01 $\pm$ 0.02         |
| $\sigma_\alpha^2=0.06$ | 2K (1K_QTL+1K_SNP)   | 0.06 $\pm$ 0.02    | 0.03 $\pm$ 0.02    | 0.07 $\pm$ 0.02         | 0.03 $\pm$ 0.02         |
| $\sigma_\delta^2=0.06$ | 3K                   | 0.05 $\pm$ 0.02    | 0.01 $\pm$ 0.03    | 0.05 $\pm$ 0.02         | 0.01 $\pm$ 0.04         |
|                        | 7K                   | 0.05 $\pm$ 0.02    | 0.02 $\pm$ 0.04    | 0.06 $\pm$ 0.02         | 0.02 $\pm$ 0.04         |
|                        | 40K                  | 0.06 $\pm$ 0.02    | 0.02 $\pm$ 0.04    | 0.07 $\pm$ 0.03         | 0.03 $\pm$ 0.04         |
|                        | 41K (40K+1K_QTL)     | 0.06 $\pm$ 0.02    | 0.03 $\pm$ 0.04    | 0.07 $\pm$ 0.03         | 0.03 $\pm$ 0.05         |
| $h_\alpha^2=0.05$      | 1K_QTL               | 0.07 $\pm$ 0.02    | 0.14 $\pm$ 0.04    | 0.09 $\pm$ 0.02         | 0.17 $\pm$ 0.06         |
| $h_\delta^2=0.15$      | 1K_SNP               | 0.05 $\pm$ 0.02    | 0.01 $\pm$ 0.01    | 0.06 $\pm$ 0.03         | 0.01 $\pm$ 0.02         |
| $\sigma_\alpha^2=0.06$ | 2K (1K_QTL+1K_SNP)   | 0.08 $\pm$ 0.02    | 0.15 $\pm$ 0.05    | 0.10 $\pm$ 0.02         | 0.18 $\pm$ 0.07         |
| $\sigma_\delta^2=0.19$ | 3K                   | 0.07 $\pm$ 0.03    | 0.03 $\pm$ 0.03    | 0.08 $\pm$ 0.04         | 0.04 $\pm$ 0.04         |
|                        | 7K                   | 0.07 $\pm$ 0.03    | 0.07 $\pm$ 0.06    | 0.09 $\pm$ 0.04         | 0.08 $\pm$ 0.07         |
|                        | 40K                  | 0.07 $\pm$ 0.03    | 0.12 $\pm$ 0.08    | 0.09 $\pm$ 0.04         | 0.15 $\pm$ 0.10         |
|                        | 41K (40K+1K_QTL)     | 0.07 $\pm$ 0.03    | 0.15 $\pm$ 0.09    | 0.09 $\pm$ 0.04         | 0.19 $\pm$ 0.11         |
| $h_\alpha^2=0.05$      | 1K_QTL               | 0.07 $\pm$ 0.02    | 0.29 $\pm$ 0.03    | 0.11 $\pm$ 0.04         | 0.45 $\pm$ 0.05         |
| $h_\delta^2=0.30$      | 1K_SNP               | 0.05 $\pm$ 0.02    | 0.02 $\pm$ 0.02    | 0.07 $\pm$ 0.03         | 0.03 $\pm$ 0.02         |
| $\sigma_\alpha^2=0.08$ | 2K (1K_QTL+1K_SNP)   | 0.07 $\pm$ 0.02    | 0.29 $\pm$ 0.03    | 0.11 $\pm$ 0.03         | 0.45 $\pm$ 0.05         |
| $\sigma_\delta^2=0.46$ | 3K                   | 0.06 $\pm$ 0.02    | 0.05 $\pm$ 0.03    | 0.10 $\pm$ 0.03         | 0.07 $\pm$ 0.04         |
|                        | 7K                   | 0.07 $\pm$ 0.02    | 0.09 $\pm$ 0.04    | 0.11 $\pm$ 0.03         | 0.13 $\pm$ 0.06         |
|                        | 40K                  | 0.07 $\pm$ 0.02    | 0.20 $\pm$ 0.06    | 0.10 $\pm$ 0.03         | 0.31 $\pm$ 0.10         |
|                        | 41K (40K+1K_QTL)     | 0.07 $\pm$ 0.02    | 0.27 $\pm$ 0.07    | 0.10 $\pm$ 0.03         | 0.42 $\pm$ 0.11         |
| $h_\alpha^2=0.15$      | 1K_QTL               | 0.15 $\pm$ 0.02    | 0.04 $\pm$ 0.02    | 0.19 $\pm$ 0.03         | 0.05 $\pm$ 0.03         |
| $h_\delta^2=0.05$      | 1K_SNP               | 0.09 $\pm$ 0.02    | 0.01 $\pm$ 0.02    | 0.11 $\pm$ 0.02         | 0.02 $\pm$ 0.02         |
| $\sigma_\alpha^2=0.19$ | 2K (1K_QTL+1K_SNP)   | 0.15 $\pm$ 0.02    | 0.05 $\pm$ 0.02    | 0.19 $\pm$ 0.03         | 0.06 $\pm$ 0.02         |
| $\sigma_\delta^2=0.06$ | 3K                   | 0.13 $\pm$ 0.02    | 0.02 $\pm$ 0.03    | 0.16 $\pm$ 0.03         | 0.03 $\pm$ 0.03         |
|                        | 7K                   | 0.15 $\pm$ 0.02    | 0.02 $\pm$ 0.02    | 0.19 $\pm$ 0.03         | 0.02 $\pm$ 0.02         |
|                        | 40K                  | 0.17 $\pm$ 0.02    | 0.04 $\pm$ 0.04    | 0.21 $\pm$ 0.03         | 0.04 $\pm$ 0.05         |
|                        | 41K (40K+1K_QTL)     | 0.17 $\pm$ 0.02    | 0.04 $\pm$ 0.04    | 0.21 $\pm$ 0.03         | 0.05 $\pm$ 0.05         |
| $h_\alpha^2=0.15$      | 1K_QTL               | 0.17 $\pm$ 0.02    | 0.16 $\pm$ 0.03    | 0.24 $\pm$ 0.04         | 0.22 $\pm$ 0.04         |
| $h_\delta^2=0.15$      | 1K_SNP               | 0.10 $\pm$ 0.03    | 0.01 $\pm$ 0.01    | 0.15 $\pm$ 0.04         | 0.01 $\pm$ 0.02         |
| $\sigma_\alpha^2=0.21$ | 2K (1K_QTL+1K_SNP)   | 0.17 $\pm$ 0.03    | 0.15 $\pm$ 0.04    | 0.24 $\pm$ 0.03         | 0.22 $\pm$ 0.05         |
| $\sigma_\delta^2=0.21$ | 3K                   | 0.14 $\pm$ 0.04    | 0.01 $\pm$ 0.02    | 0.21 $\pm$ 0.05         | 0.02 $\pm$ 0.02         |
|                        | 7K                   | 0.16 $\pm$ 0.04    | 0.05 $\pm$ 0.05    | 0.24 $\pm$ 0.06         | 0.07 $\pm$ 0.07         |
|                        | 40K                  | 0.19 $\pm$ 0.04    | 0.10 $\pm$ 0.06    | 0.27 $\pm$ 0.06         | 0.14 $\pm$ 0.08         |
|                        | 41K (40K+1K_QTL)     | 0.19 $\pm$ 0.04    | 0.14 $\pm$ 0.06    | 0.27 $\pm$ 0.06         | 0.20 $\pm$ 0.09         |
| $h_\alpha^2=0.15$      | 1K_QTL               | 0.15 $\pm$ 0.02    | 0.30 $\pm$ 0.03    | 0.28 $\pm$ 0.04         | 0.54 $\pm$ 0.06         |
| $h_\delta^2=0.30$      | 1K_SNP               | 0.11 $\pm$ 0.02    | 0.01 $\pm$ 0.01    | 0.19 $\pm$ 0.04         | 0.02 $\pm$ 0.02         |
| $\sigma_\alpha^2=0.27$ | 2K (1K_QTL+1K_SNP)   | 0.16 $\pm$ 0.03    | 0.30 $\pm$ 0.04    | 0.29 $\pm$ 0.05         | 0.54 $\pm$ 0.07         |
| $\sigma_\delta^2=0.55$ | 3K                   | 0.14 $\pm$ 0.02    | 0.04 $\pm$ 0.03    | 0.25 $\pm$ 0.04         | 0.07 $\pm$ 0.06         |
|                        | 7K                   | 0.16 $\pm$ 0.02    | 0.09 $\pm$ 0.04    | 0.30 $\pm$ 0.04         | 0.16 $\pm$ 0.08         |
|                        | 40K                  | 0.18 $\pm$ 0.03    | 0.18 $\pm$ 0.06    | 0.32 $\pm$ 0.05         | 0.34 $\pm$ 0.11         |
|                        | 41K (40K+1K_QTL)     | 0.18 $\pm$ 0.03    | 0.26 $\pm$ 0.06    | 0.32 $\pm$ 0.05         | 0.48 $\pm$ 0.10         |

|                          |                    |           |           |           |           |
|--------------------------|--------------------|-----------|-----------|-----------|-----------|
| $h_{\alpha}^2=0.30$      | 1K_QTL             | 0.28±0.02 | 0.05±0.02 | 0.42±0.04 | 0.07±0.03 |
| $h_{\delta}^2=0.05$      | 1K_SNP             | 0.17±0.02 | 0.01±0.02 | 0.26±0.03 | 0.02±0.03 |
| $\sigma_{\alpha}^2=0.46$ | 2K (1K_QTL+1K_SNP) | 0.29±0.02 | 0.05±0.04 | 0.44±0.04 | 0.08±0.06 |
| $\sigma_{\delta}^2=0.08$ | 3K                 | 0.22±0.02 | 0.01±0.02 | 0.34±0.03 | 0.02±0.03 |
|                          | 7K                 | 0.25±0.02 | 0.02±0.03 | 0.38±0.03 | 0.03±0.04 |
|                          | 40K                | 0.28±0.01 | 0.05±0.05 | 0.43±0.03 | 0.08±0.08 |
|                          | 41K (40K+1K_QTL)   | 0.29±0.01 | 0.06±0.05 | 0.44±0.03 | 0.10±0.08 |
| $h_{\alpha}^2=0.30$      | 1K_QTL             | 0.30±0.02 | 0.15±0.01 | 0.53±0.05 | 0.27±0.03 |
| $h_{\delta}^2=0.15$      | 1K_SNP             | 0.19±0.01 | 0.01±0.02 | 0.34±0.02 | 0.02±0.03 |
| $\sigma_{\alpha}^2=0.55$ | 2K (1K_QTL+1K_SNP) | 0.31±0.02 | 0.15±0.03 | 0.56±0.05 | 0.27±0.05 |
| $\sigma_{\delta}^2=0.27$ | 3K                 | 0.25±0.02 | 0.02±0.02 | 0.46±0.04 | 0.04±0.04 |
|                          | 7K                 | 0.30±0.02 | 0.06±0.04 | 0.54±0.03 | 0.12±0.08 |
|                          | 40K                | 0.32±0.02 | 0.14±0.07 | 0.58±0.04 | 0.25±0.12 |
|                          | 41K (40K+1K_QTL)   | 0.32±0.02 | 0.17±0.06 | 0.59±0.04 | 0.32±0.11 |
| $h_{\alpha}^2=0.30$      | 1K_QTL             | 0.29±0.02 | 0.31±0.03 | 0.69±0.06 | 0.74±0.07 |
| $h_{\delta}^2=0.30$      | 1K_SNP             | 0.18±0.02 | 0.02±0.01 | 0.45±0.05 | 0.05±0.03 |
| $\sigma_{\alpha}^2=0.75$ | 2K (1K_QTL+1K_SNP) | 0.30±0.02 | 0.31±0.03 | 0.72±0.06 | 0.75±0.08 |
| $\sigma_{\delta}^2=0.75$ | 3K                 | 0.24±0.03 | 0.04±0.02 | 0.59±0.07 | 0.11±0.04 |
|                          | 7K                 | 0.28±0.03 | 0.11±0.04 | 0.69±0.08 | 0.26±0.10 |
|                          | 40K                | 0.30±0.03 | 0.22±0.04 | 0.74±0.08 | 0.55±0.11 |
|                          | 41K (40K+1K_QTL)   | 0.31±0.03 | 0.30±0.05 | 0.75±0.08 | 0.73±0.12 |

$h_{\alpha}^2$  = true additive heritability,  $h_{\delta}^2$  = true dominance heritability,  $\sigma_{\alpha}^2$  = true additive variance,  $\sigma_{\delta}^2$  = true dominance variance,  $\hat{h}_{\alpha}^2$  = estimated additive heritability,  $\hat{h}_{\delta}^2$  = estimated dominance heritability,  $\hat{\sigma}_{\alpha}^2$  = estimated additive variance,  $\hat{\sigma}_{\delta}^2$  = estimated dominance variance.
